# Supplementary material for: Dense module searching for gene networks associated with multiple sclerosis
Source: PubMed Central journal article supplement (PMC7118851; doi:10.1186/s12920-020-0674-5), 2020-04-03

GeneMSA GWAS of 2009 SNP-level Manhattan Plot

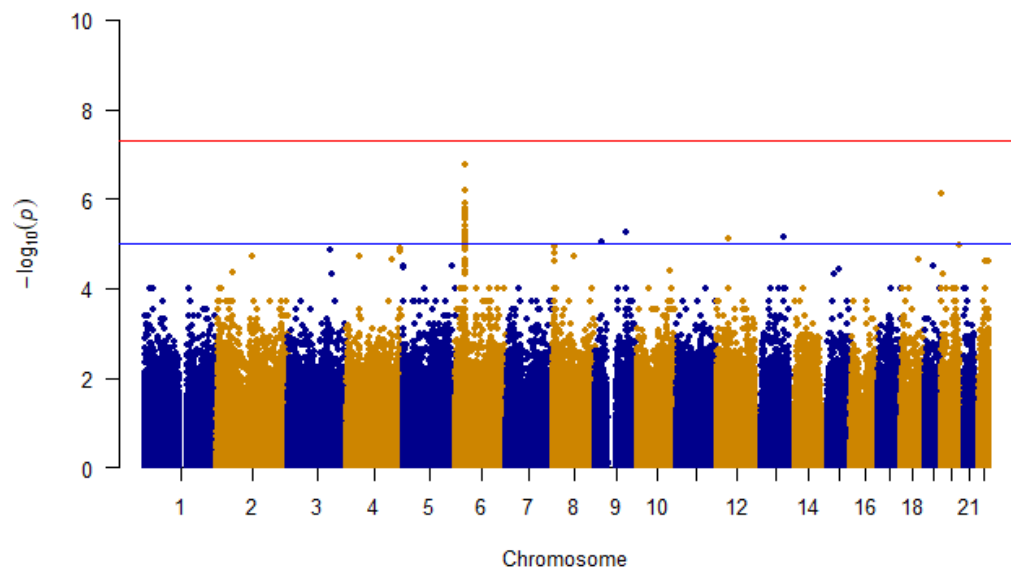

IMSGC GWAS of 2011 SNP-level Manhattan Plot

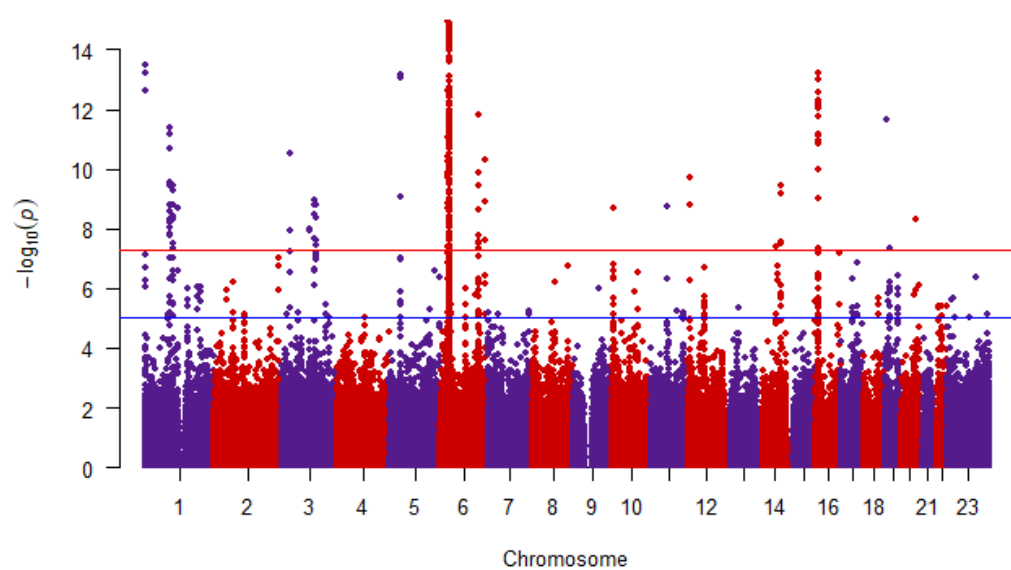

GeneMSA GWAS of 2009 Gene-level Manhattan Plot

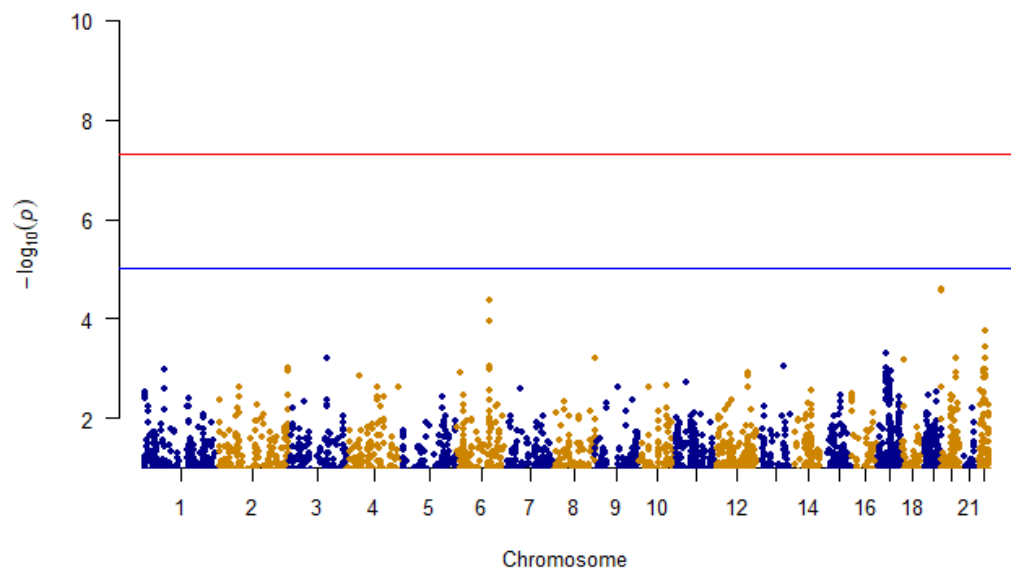

IMSGC GWAS of 2011 Gene-level Manhattan Plot

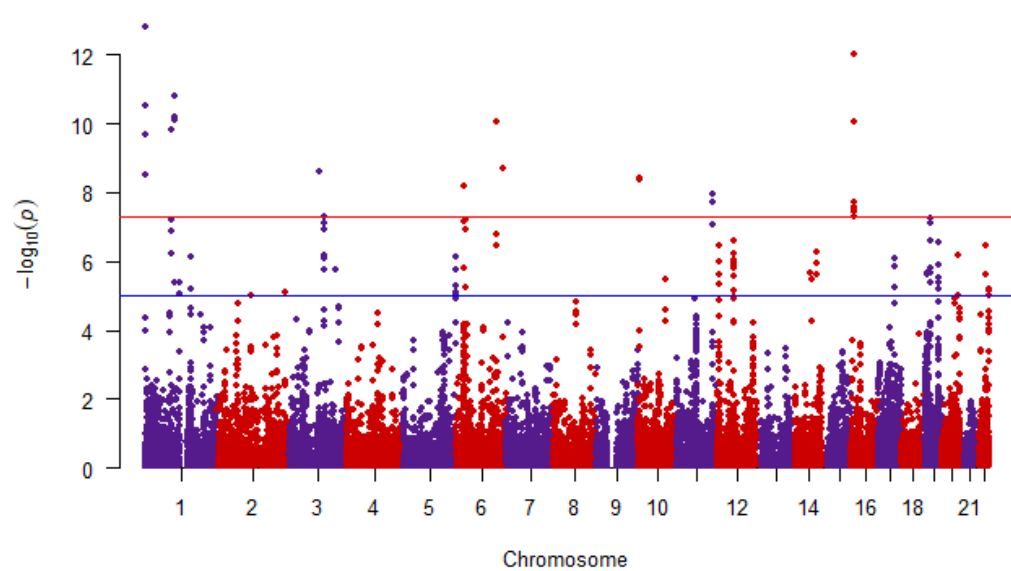

Supplement: 12920_2020_674_MOESM2_ESM.pdf [file 12920_2020_674_MOESM2_ESM.pdf]
