# Supplementary material for: Dense module searching for gene networks associated with multiple sclerosis
Source: PubMed Central journal article supplement (PMC7118851; doi:10.1186/s12920-020-0674-5), 2020-04-03

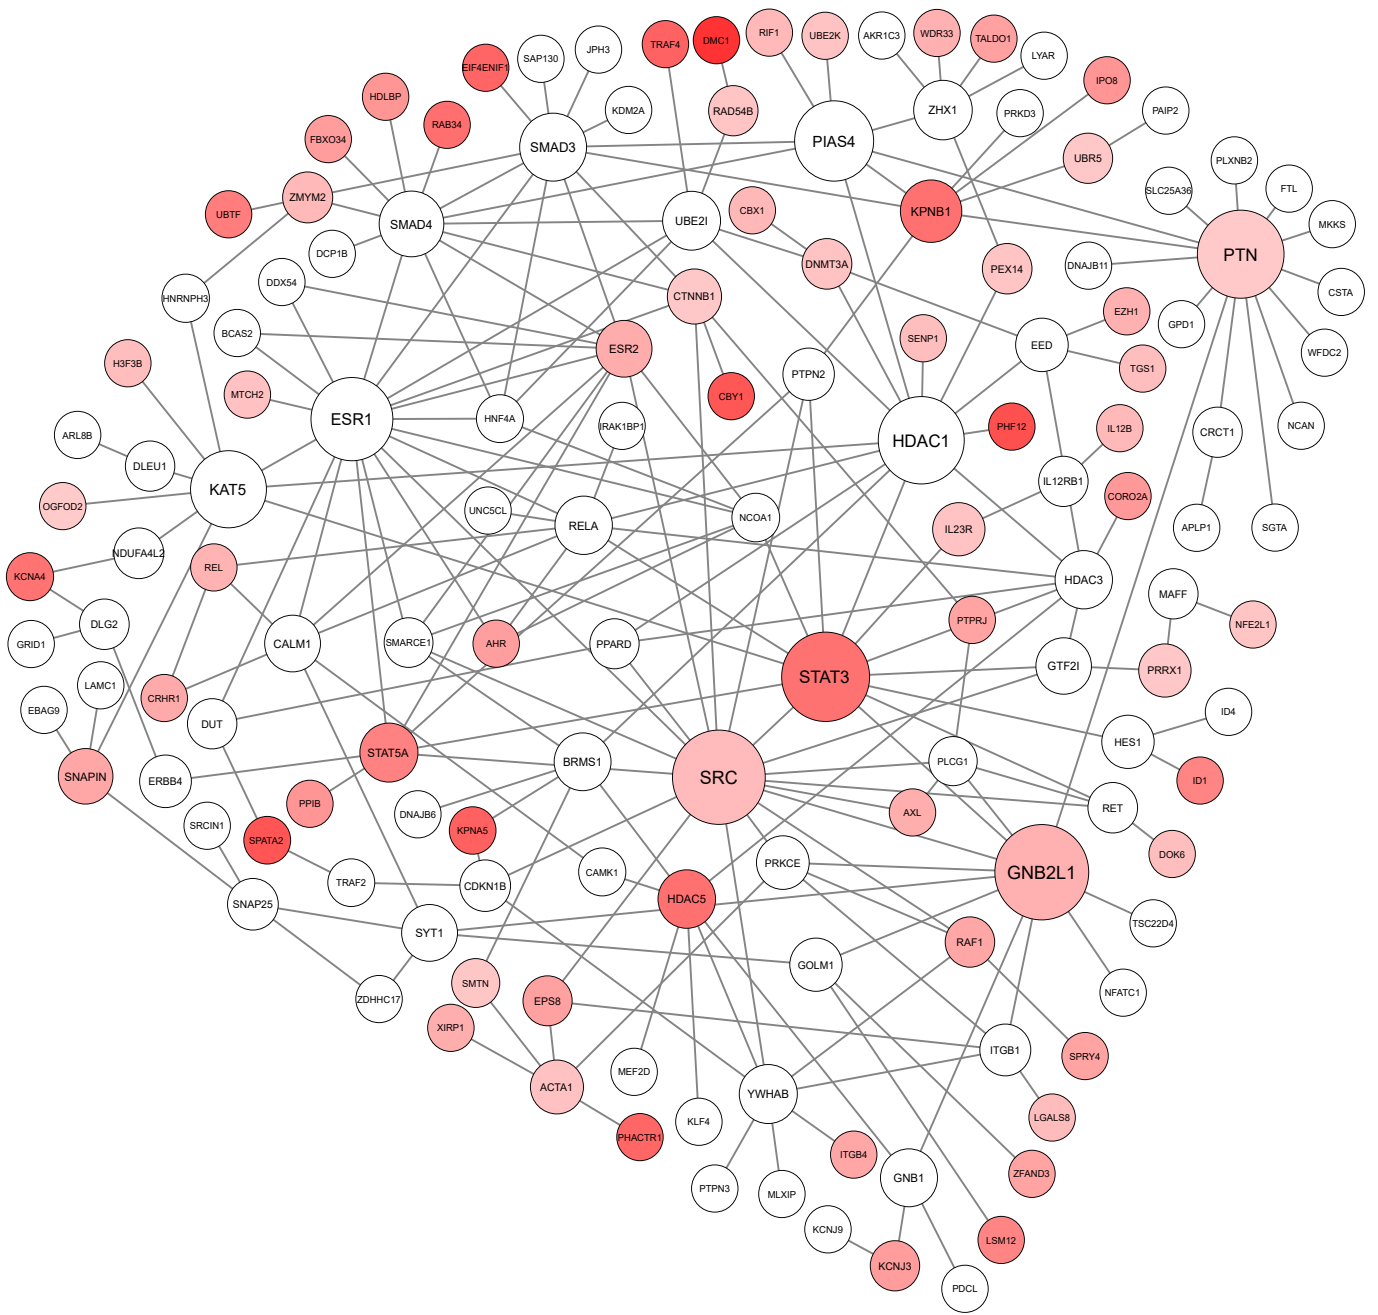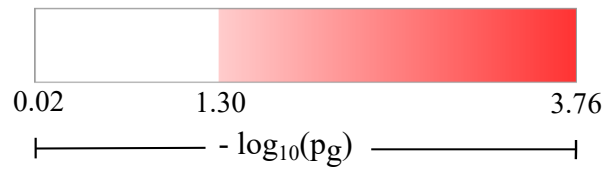

Supplement: 12920_2020_674_MOESM3_ESM.pdf [file 12920_2020_674_MOESM3_ESM.pdf]
